# Supplementary material for: The thermogenic actions of natriuretic peptide in brown adipocytes: The direct measurement of the intracellular temperature using a fluorescent thermoprobe
Source: PubMed Central journal article supplement (PMC5636787; doi:10.1038/s41598-017-13563-1), 2017-10-11
Supplement: 41598_2017_13563_MOESM1_ESM.pdf [file 41598_2017_13563_MOESM1_ESM.pdf]

## **Supplementary Information**

### **The thermogenic actions of natriuretic peptide in brown adipocytes: The direct measurement of the intracellular temperature using a fluorescent thermoprobe**

Haruka Kimura, Tomohisa Nagoshi\*, Akira Yoshii, Yusuke Kashiwagi, Yoshiro Tanaka, Keiichi Ito, Takuya Yoshino, Toshikazu D. Tanaka, Michihiro Yoshimura

**Supplementary Table. Fluorescence Ratio at each time point after treatment with ANP**

| Control<br>(n) | 0            | 54           | 60           | (minute) |
|----------------|--------------|--------------|--------------|----------|
| 1              | 0.510±0.0199 | 0.491±0.0215 | 0.494±0.0235 |          |
| 2              | 0.468±0.0174 | 0.457±0.0172 | 0.456±0.0174 |          |
| 3              | 0.501±0.0159 | 0.487±0.0153 | 0.487±0.0157 |          |
| 4              | 0.555±0.0171 | 0.549±0.0183 | 0.549±0.0190 |          |
| 5              | 0.510±0.0285 | 0.509±0.0245 | 0.509±0.0249 |          |
| 6              | 0.486±0.0142 | 0.483±0.0144 | 0.483±0.0143 |          |

  

| ANP<br>(n) | 0            | 54           | 60           | (minute) |
|------------|--------------|--------------|--------------|----------|
| 1          | 0.486±0.0189 | 0.497±0.0214 | 0.500±0.0215 |          |
| 2          | 0.443±0.0147 | 0.449±0.0226 | 0.450±0.0220 |          |
| 3          | 0.460±0.0156 | 0.462±0.0173 | 0.463±0.0180 |          |
| 4          | 0.505±0.0201 | 0.513±0.0175 | 0.516±0.0183 |          |
| 5          | 0.513±0.0204 | 0.519±0.0218 | 0.520±0.0222 |          |
| 6          | 0.499±0.0163 | 0.499±0.0221 | 0.502±0.0270 |          |

p=0.016, two-way ANOVA

## Supplementary Figure Legend

**Supplementary Figure S1. Representative microscopic images of rat white adipocytes treated with the fluorescent polymeric thermometer.** A differential interference contrast image (a), a fluorescence image (490 nm excitation, 525 nm emission), (b) and a fluorescence image (490 nm excitation, 605 nm emission) (c) of the cellular thermoprobe in rat brown adipocytes on day 8. A merged image of (b) and (c) with the sampling square of the measurement are also shown in (d). Scale bar: 40  $\mu\text{m}$ .

**Supplementary Figure S2. The calibration curve of the fluorescent polymeric thermometer in rat white adipocytes.** The responses of the fluorescence ratio (605nm/525nm) were analyzed (n=4). The data indicate the mean  $\pm$  SEM.

**Supplementary Figure S3. ANP increases the UCP1 levels in rat brown adipocytes.** The quantification of the *Ucp1* gene expression levels in rat brown adipocytes (day 7 or 8) after six hours of incubation with ANP ( $10^{-9}$  M or  $10^{-7}$  M) or isoproterenol ( $10^{-7}$  M) (n=5) at 37°C. The qPCR data were normalized to GAPDH. The data are shown as the fold change normalized to the levels found in untreated cells (control) \*P < 0.05 versus control (unpaired two-tailed Student's t-test). Iso, isoproterenol.

**Supplementary Figure S4. The profile of the intracellular temperature change in rat white adipocytes incubated with ANP.** The intracellular temperature was indicated by the fluorescence ratio (605 nm/525 nm). The changes of the fluorescence ratio in rat white adipocytes (day 8) after treatment with ANP ( $10^{-7}$ M), isoproterenol ( $10^{-7}$ M), or CL316,243 (0.5  $\mu\text{M}$ ) were recorded every 6 minutes at 35°C (n=3 each). The data represent the mean  $\pm$  SEM.

**Supplementary Figure S5. ANP does not increase the UCP1 levels in rat white adipocytes.** The quantification of the *Ucp1* gene expression levels in rat white adipocytes (day 7 or 8) after one hour of incubation with ANP ( $10^{-7}$  M), isoproterenol ( $10^{-7}$  M), or CL316,243 (0.5  $\mu\text{M}$ ) (n=3 each). The qPCR data were normalized to GAPDH. The data are shown as the fold change normalized to the levels found in untreated cells (control) Iso, isoproterenol. CL, CL 316,243.

## Supplementary Figure S6. Full-length blots of phospho-p38 and total p38.

Western blotting of phosphorylation of p38MAPK and total p38MAPK in rat brown adipocytes treated with or without ANP ( $10^{-7}$  M) for 60 minutes. M, MagicMark XP Western Protein standard, a molecular weight marker. kDa, kilo Dalton.

**(a)**

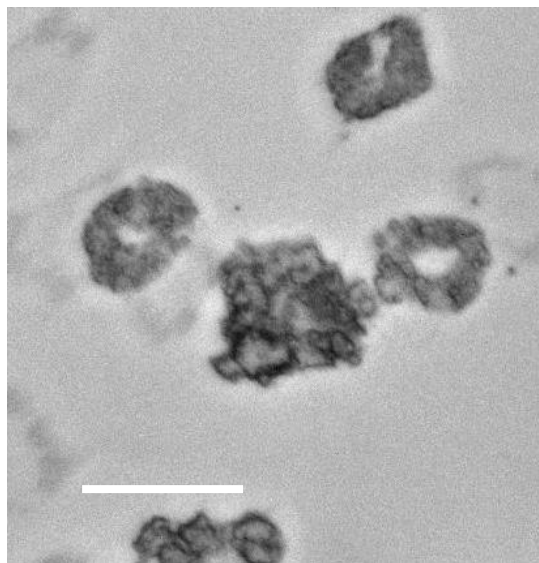

**(b)**

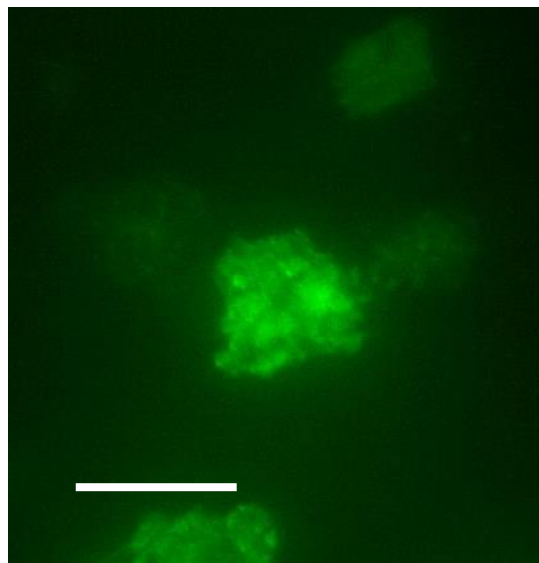

**(c)**

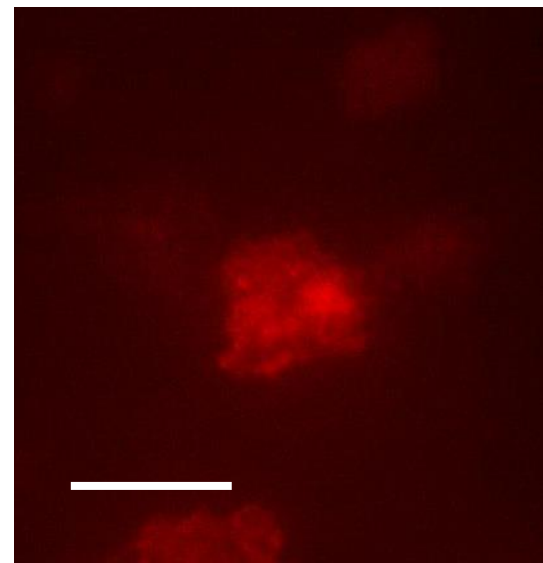

**(d)**

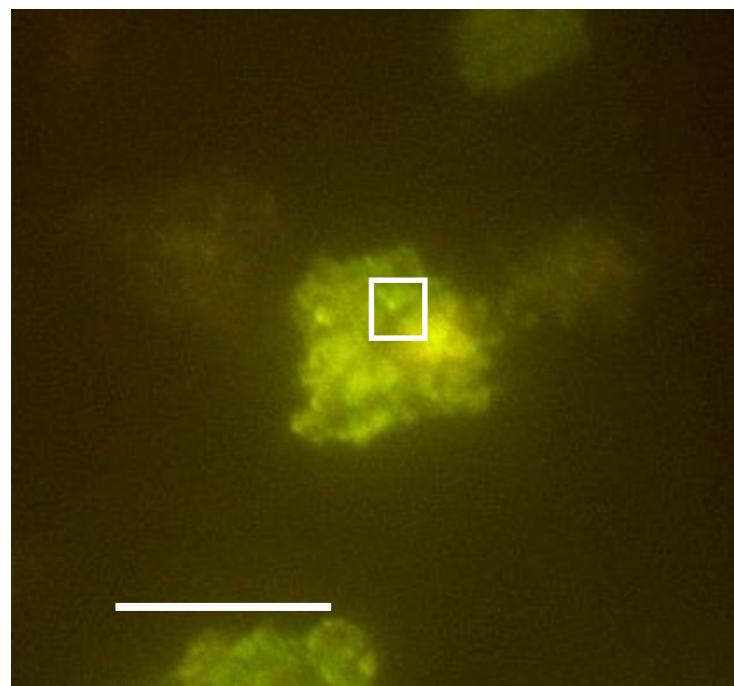

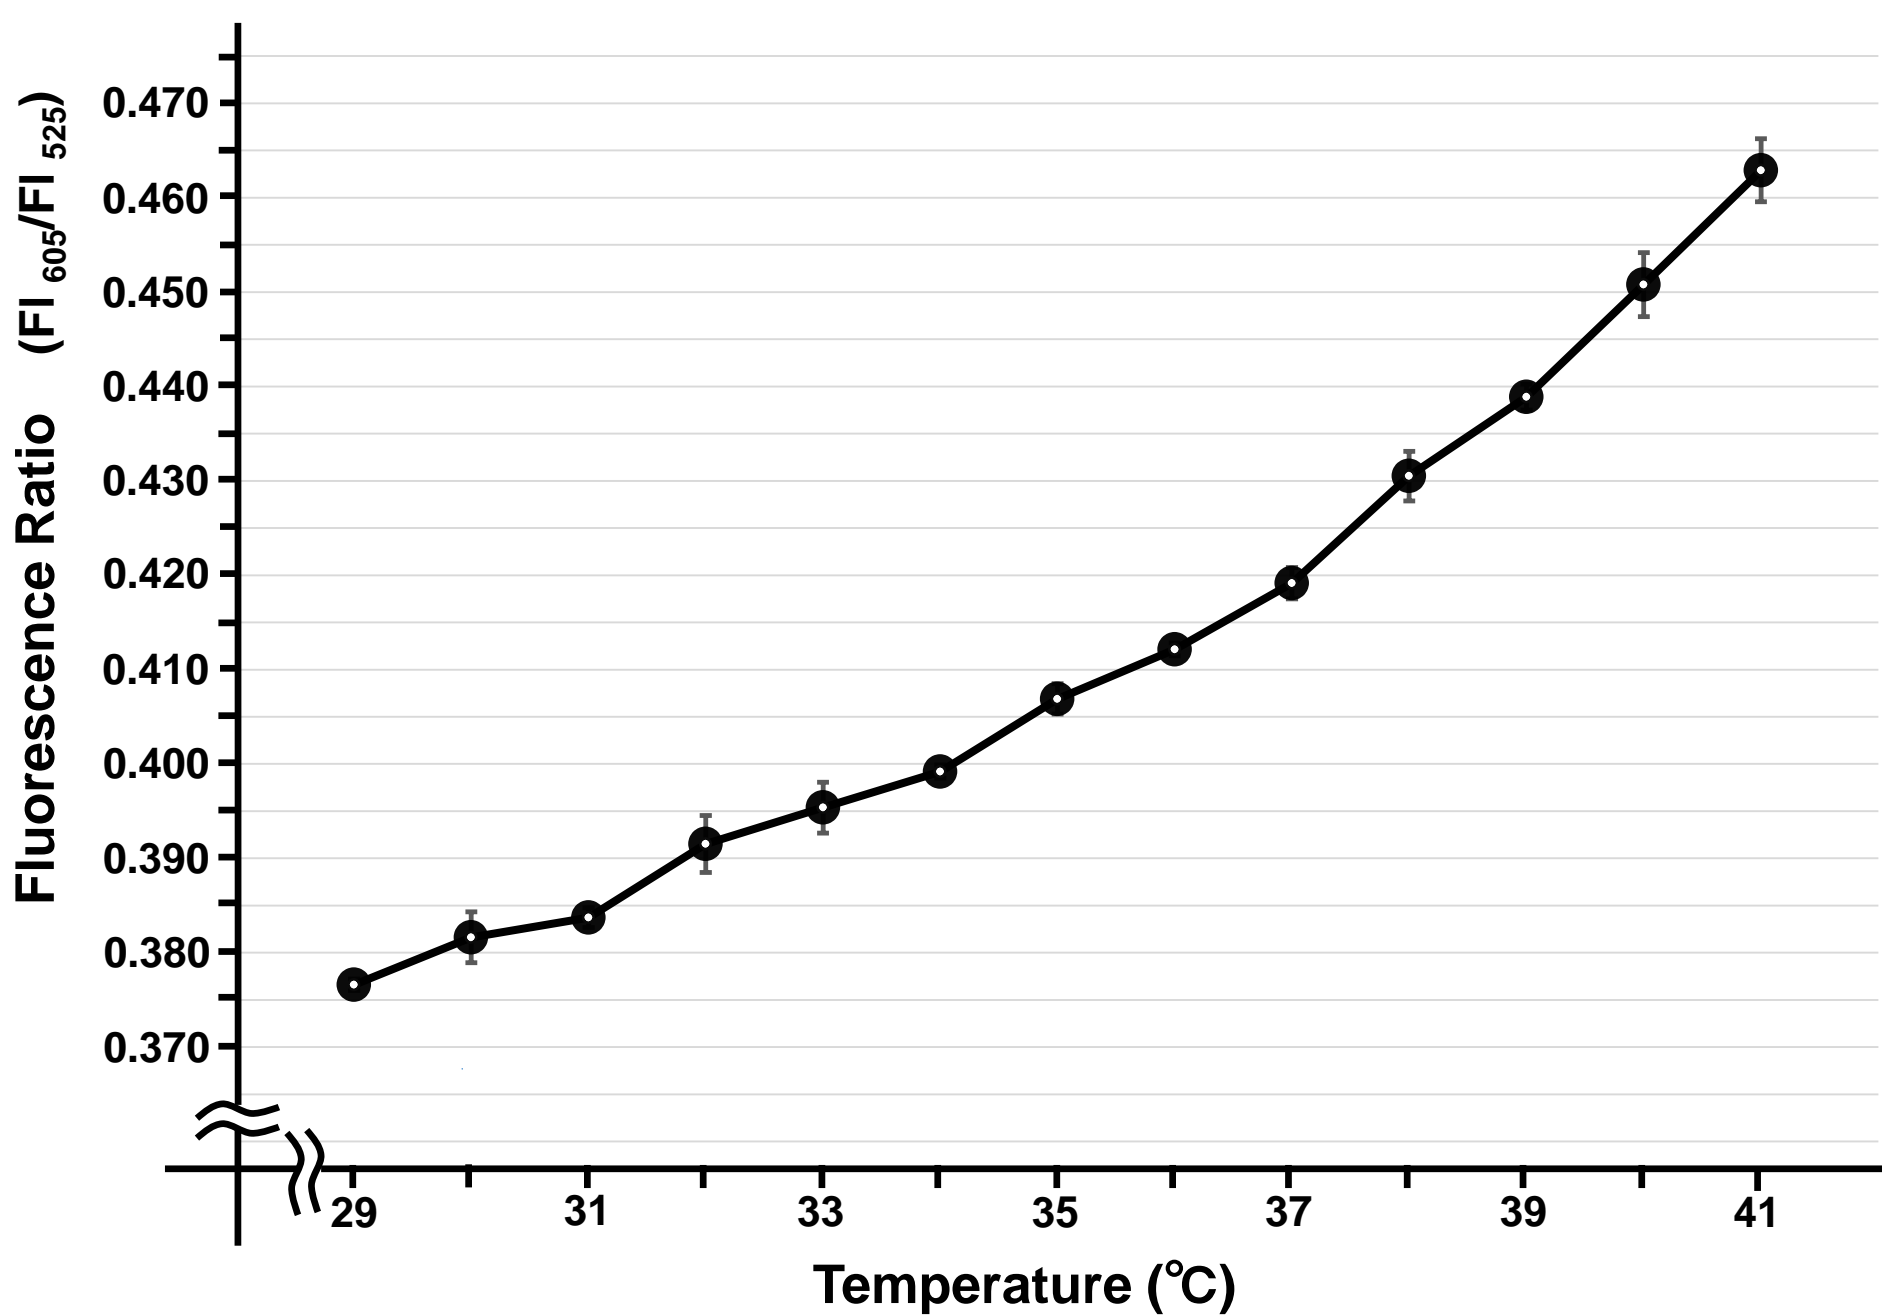

***Supplementary Fig. S2***

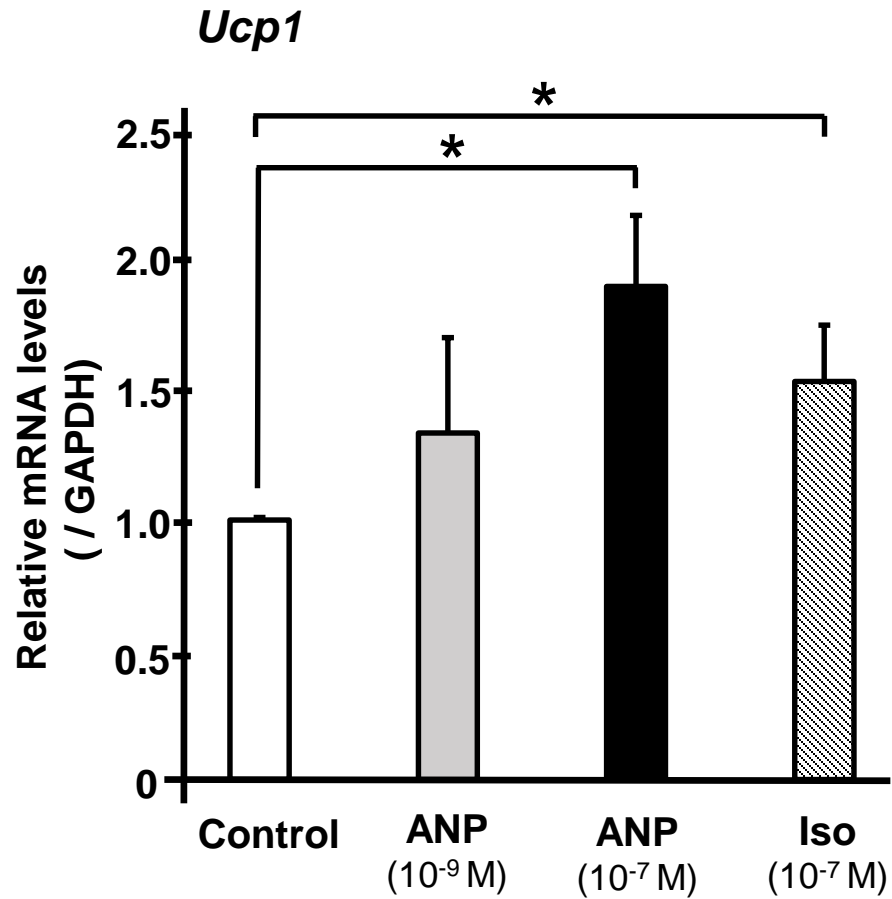

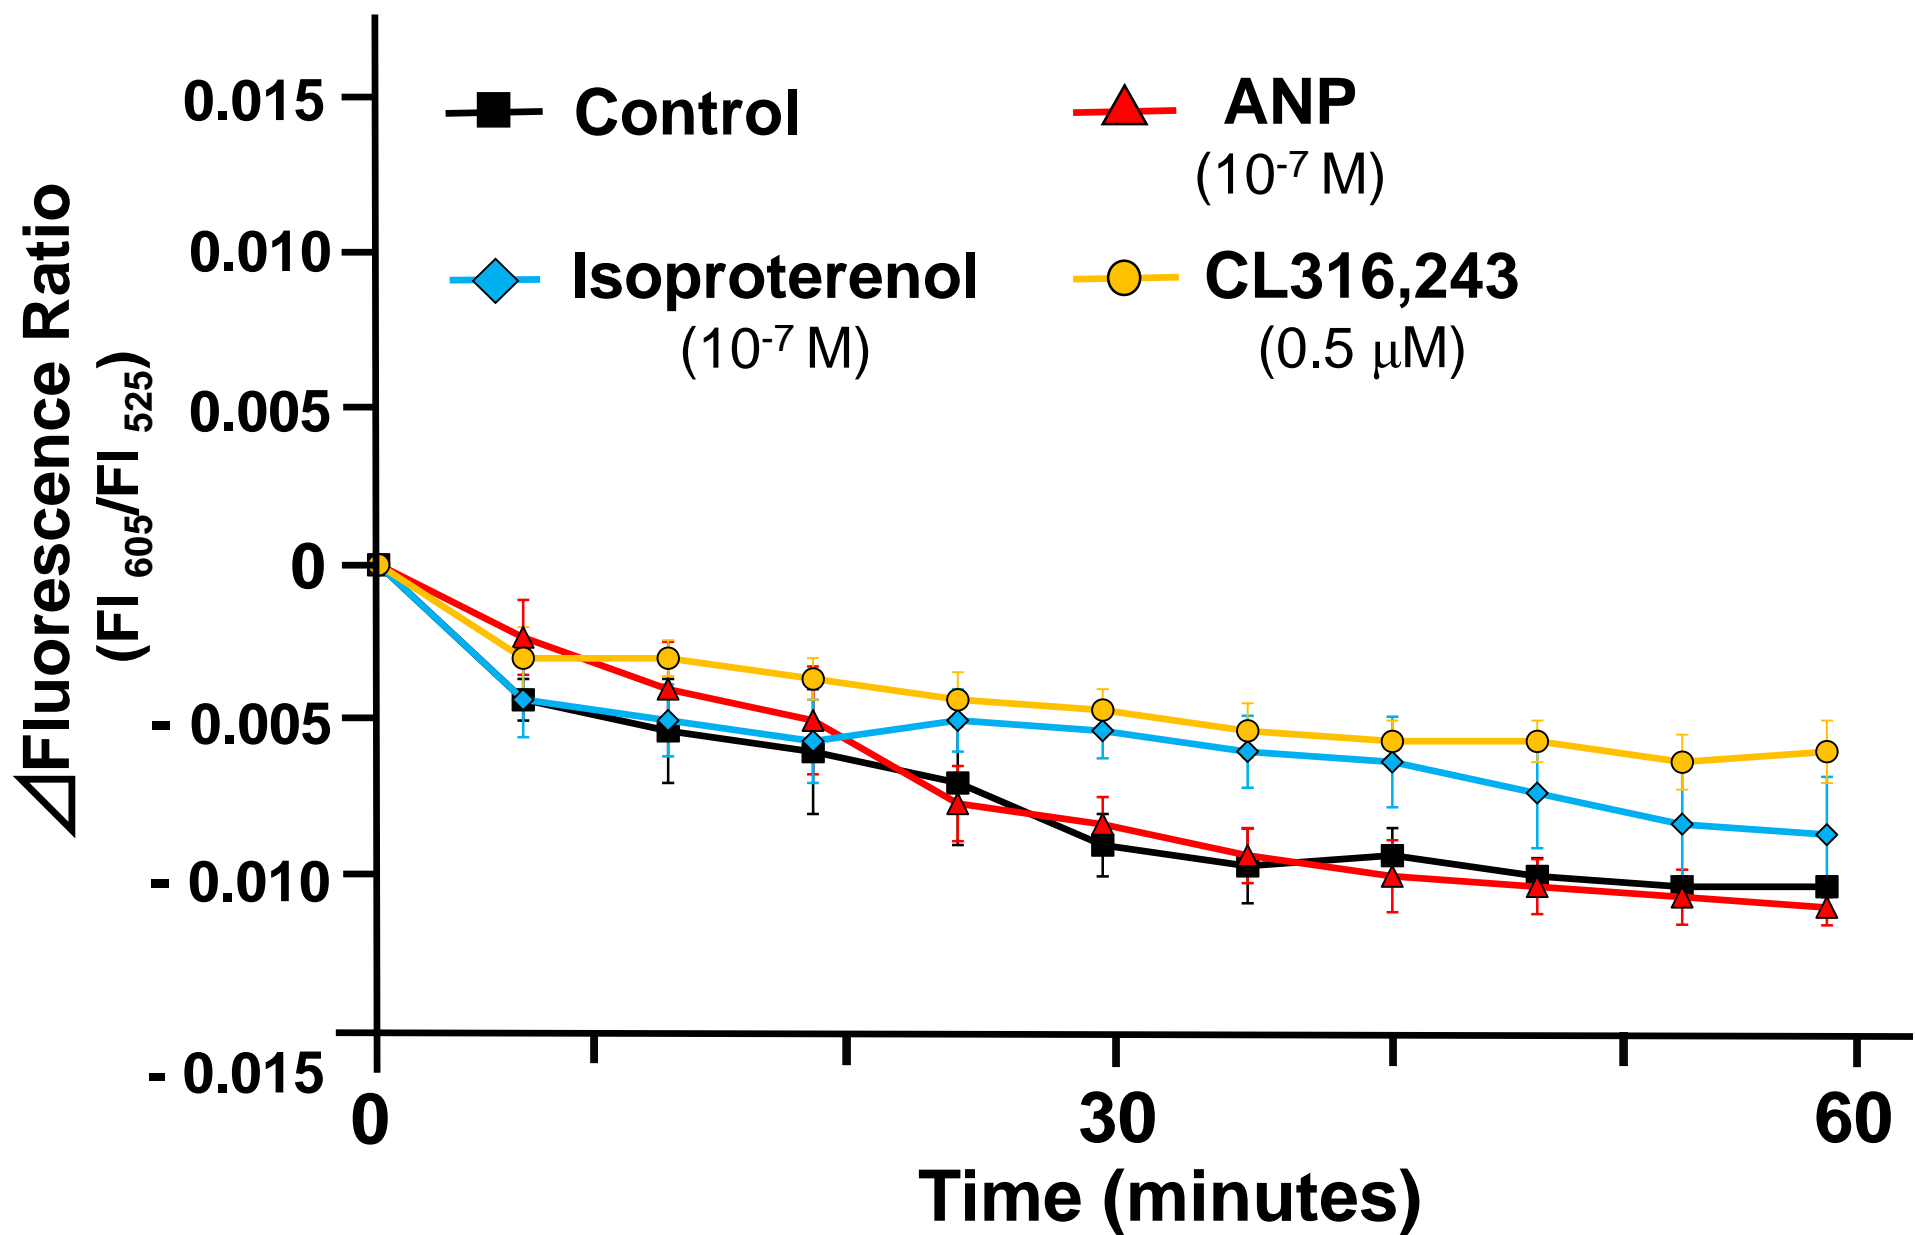

*Supplementary Fig. S4*

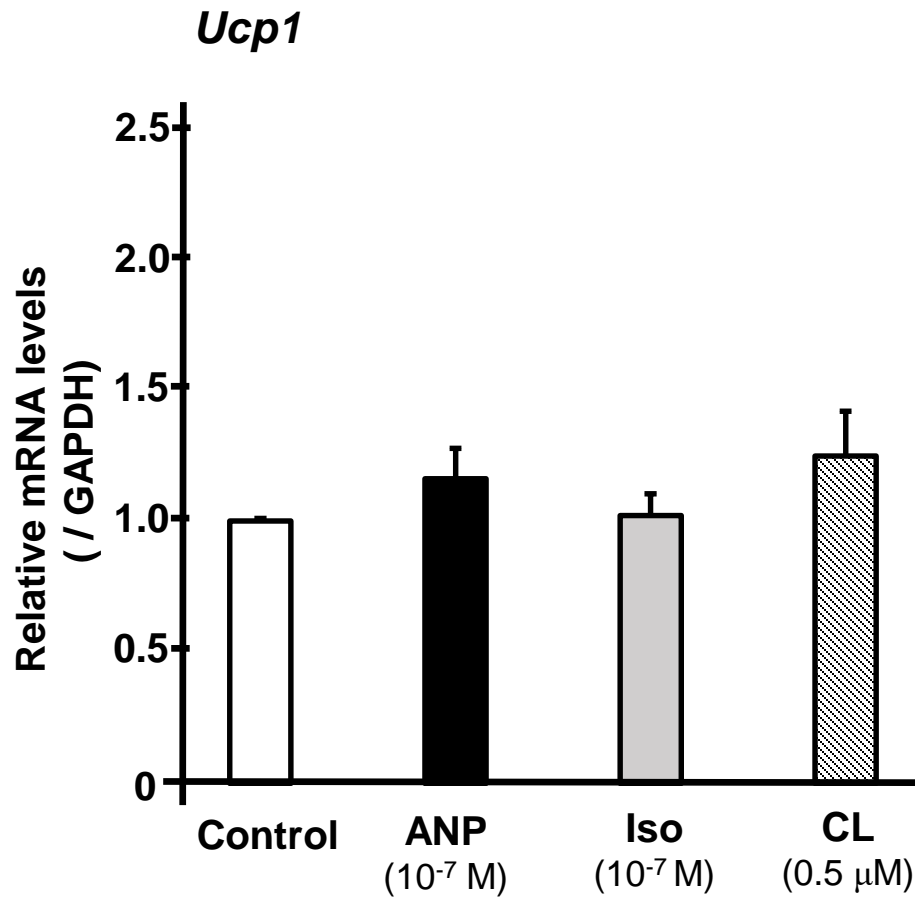



**p-p38**

**total p38**

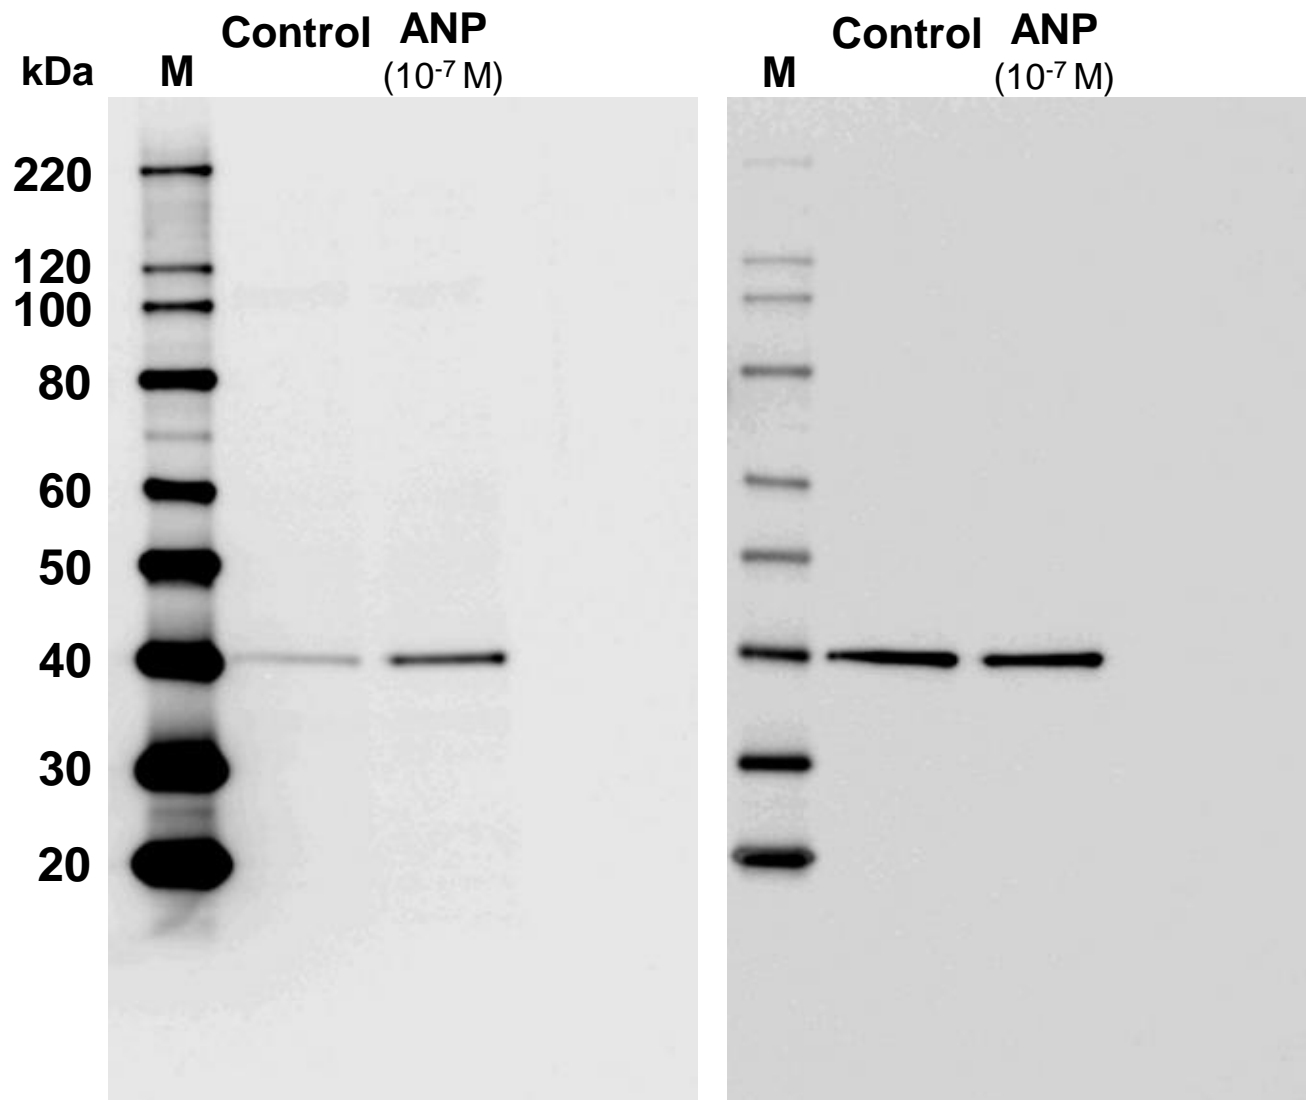

***Supplementary Fig. S6***
